# 1 Untapped microbial composition along a horizontal oxygen gradient in a Costa Rican 2 volcanic influenced acid rock drainage system

3  
4 Alejandro Arce-Rodríguez<sup>1,α</sup>, Fernando Puente-Sánchez<sup>2</sup>, Roberto Avendaño<sup>3</sup>, Eduardo Libby<sup>4</sup>, Raúl Mora-  
5 Amador<sup>5,6</sup>, Keilor Rojas-Jimenez<sup>7</sup>, Dietmar H. Pieper<sup>1</sup> & Max Chavarría<sup>3,4,8\*</sup>

6  
7 <sup>1</sup>Microbial Interactions and Processes Research Group, Helmholtz Centre for Infection Research, 38124,  
8 Braunschweig, Germany <sup>2</sup>Systems Biology Program, Centro Nacional de Biotecnología (CNB-CSIC), C/Darwin 3,  
9 28049 Madrid, Spain <sup>3</sup>Centro Nacional de Innovaciones Biotecnológicas (CENIBiot), CeNAT-CONARE, 1174-  
10 1200, San José, Costa Rica <sup>4</sup>Escuela de Química, Universidad de Costa Rica, 11501-2060, San José, Costa Rica  
11 <sup>5</sup>Escuela Centroamericana de Geología, Universidad de Costa Rica, 11501-2060, San José, Costa Rica  
12 <sup>6</sup>Laboratorio de Ecología Urbana, Universidad Estatal a Distancia, 11501-2060, San José, Costa Rica <sup>7</sup>Escuela de  
13 Biología, Universidad de Costa Rica, 11501-2060, San José, Costa Rica <sup>8</sup>Centro de Investigaciones en Productos  
14 Naturales (CIPRONA), Universidad de Costa Rica, 11501-2060, San José, Costa Rica.

15  
16 **Keywords:** Costa Rica, San Cayetano, Acid Rock Drainage, Microbial Communities, Oxygen gradient.

---

17  
18 **<sup>α</sup> Current affiliation:**

19 Department of Molecular Bacteriology  
20 Helmholtz Centre for Infection Research  
21 38124, Braunschweig, Germany

22  
23 **\* Correspondence to:** Max Chavarría

24 Escuela de Química & Centro de Investigaciones en Productos Naturales (CIPRONA)  
25 Universidad de Costa Rica  
26 Sede Central, San Pedro de Montes de Oca  
27 San José, 11501-2060, Costa Rica  
28 Phone (+506) 2511 8520. Fax (+506) 2253 5020  
29 E-mail: [max.chavarría@ucr.ac.cr](mailto:max.chavarría@ucr.ac.cr)  
30 ORCID: <https://orcid.org/0000-0001-5901-3576>

## 31 Abstract

32 Based on the analysis of 16S rRNA gene metabarcoding, here we report the shift in the microbial community  
33 structure along a horizontal oxygen gradient (0.40-6.06 mg L<sup>-1</sup>) in a volcanic influenced acid rock drainage (VARD)  
34 environment, known as San Cayetano (Cartago, Costa Rica; pH =2.94-3.06, sulfate ~0.87-1.19 g L<sup>-1</sup>, iron ~35-61  
35 mg L<sup>-1</sup>). This VARD is dominated by microorganisms involved in the geochemical cycling of iron, sulfur and  
36 nitrogen; however, the identity of the species changes with the oxygen gradient along the river course. The anoxic  
37 spring of San Cayetano is dominated by a putative anaerobic sulfate-reducing Deltaproteobacterium as well as  
38 sulfur-oxidizing bacteria (such as *Acidithiobacillus* or *Sulfobacillus*), which favor the process of dissolution of  
39 sulfide minerals and oxidation of H<sub>2</sub>S. In oxic conditions, aerobic iron-oxidizers (*Leptospirillum*, *Acidithrix*,  
40 *Ferritrophicum*, *Ferrovum*) and heterotrophic bacteria (Burkholderiaceae Betaproteobacterium, *Trichococcus*,  
41 *Acidoceella*) were identified among others. Thermoplasmatales archaea closely related to environmental phylotypes  
42 found in other ARD/AMD niches were also found throughout the entire ecosystem. This work describes the  
43 changes in bacterial diversity, and possible metabolic activities occurring along a horizontal oxygen gradient in a  
44 volcanic influenced acid rock drainage system.

45

46

## 47 Introduction

48

49 Water bodies with elevated metal content and very high acidity are found throughout the world as the result of  
50 volcanic activity and/or biotic/abiotic processes as in acid rock drainage (ARD) sites. In ARD environments, water  
51 emerges from underground having a low pH value and remarkable amounts of chemical species such as iron,  
52 sulfate and other metals (Baker and Banfield 2003; Johnson *et al.* 2009; Sánchez-Andrea *et al.* 2011; Arce-  
53 Rodríguez *et al.* 2019). Most of the studied ARD ecosystems in the world have been caused by human activity,  
54 especially mining processes. The anthropogenic influence modifies the geology, hydrology and biology of the  
55 ARD, making difficult to pinpoint the inherent chemical and natural microbiological conditions of these sites. It is  
56 therefore of great interest to study ARD ecosystems with no history of anthropogenic influence (*i.e.* no mining).  
57 Some works on the chemistry and microbiology of natural ARD systems include the Pastoruri Glacier area in  
58 Huascarán National Park (Perú) (González-Toril *et al.* 2015), the Antarctic landmass (Dold *et al.* 2013), the  
59 Río Sucio (Braulio Carrillo National Park, Costa Rica) (Arce-Rodríguez *et al.* 2017) and the Río Tinto,  
60 located at the Iberian Pyrite Belt (IPB) of Spain (González-Toril *et al.* 2003; López-Archilla *et al.* 2004; García-

61 Moyano *et al.* 2012; Sánchez-Andrea *et al.* 2012). In the latter case, although the river and its source are located  
62 on a site that has been mined for thousands of years, it is believed by some authors that the conditions of extreme  
63 acidity and heavy metal pollution along the river are due to natural processes that were operative before mining in  
64 the region started five thousand years ago (Fernández-Remolar, Rodríguez and Gomez 2003; Amils, Fernández-  
65 Remolar and the IPBSL Team 2014). Due to its conditions, it is a good consensus that Rio Tinto should be  
66 considered a study model of ARD environments. On the other hand, the extreme acidity environments produced  
67 by discharge of the products of volcanic or hydrothermal activity (e.g. H<sub>2</sub>S oxidation or SO<sub>2</sub> reaction with water)  
68 into water bodies like lakes and rivers, share most of their natural composition with that of ARD sites and are of  
69 interest because they can be unequivocally assigned to natural causes (Urbieta *et al.* 2015, Arce-Rodríguez *et al.*  
70 2017). Thus, low pH values due to sulfuric acid and high metal content, especially iron, are a common factor to  
71 both ARD and volcanic influenced water bodies.

72

73 From a microbiological point of view, the common factor in natural ARD and volcanic environments is the  
74 presence of iron- and sulfur-oxidizing bacteria. For example, in the Pastoruri Glacier area the presence of  
75 *Acidithiobacillus*, a sulfur- and iron-oxidizing acidophilic bacterium, was detected (González-Toril *et al.* 2015). Dold  
76 *et al.* (2013) reported the formation of an ARD system in the Antarctic landmass due to the activity of psychrophilic  
77 acid mine drainage microorganisms found in cold climates, specifically *Acidithiobacillus ferrivorans* and  
78 *Thiobacillus plumbophilus*. In Costa Rica, a country with an important volcanic influence (Castellón *et al.* 2013)  
79 and tropical climatic conditions, Arce-Rodríguez *et al.* (2017) reported that Rio Sucio (a pristine ARD), is  
80 dominated by *Gallionella* spp. and other chemolithoautotrophic iron- and sulfur-oxidizing bacteria. Studies in Rio  
81 Tinto revealed that eighty percent of the water column's bacterial species corresponds to only three bacterial  
82 genera: *Leptospirillum*, *Acidithiobacillus* and *Acidiphilium*, all involved in iron cycling (González-Toril *et al.* 2003,  
83 2010). Minor levels of other iron-oxidizing bacteria such as *Ferrimicrobium*, *Acidimicrobium* and *Ferroplasma* have  
84 also been detected in Rio Tinto.

85

86 In this work, we investigated the microbiological characteristics of the source and early course of an ARD riverine  
87 environment that has a contribution of sulfuric acid by volcanic activity as well as associated chemical species  
88 product of rock dissolution processes. This volcanic influenced acid rock drainage (VARD), known as San  
89 Cayetano Creek is located in a private farm northeast of Irazu volcano (Cartago, Costa Rica) (Fig. 1). Due to its  
90 location within a private property and difficult access this site has seen little human influence. This acid stream has

91 a length of about 3 km from its source to its confluence with the previously described Rio Sucio (Arce-Rodriguez *et*  
92 *al.* 2017) but is only a minor tributary. Our results indicate that chemistry of San Cayetano is both the result of  
93 volcanic input and biological activity of iron- and sulfur-oxidizing bacteria distributed along a well-established  
94 oxygen gradient.

95

## 96 **Materials and Methods**

97

### 98 **Sampling and field measurements**

99

100 The San Cayetano acid rock drainage system is located in a private farm in Cartago, Costa Rica. All the needed  
101 permits for sampling water and sediments were requested directly to the owners of the property. In August 2016,  
102 samples of water (three samples of 1 Liter each) were collected at different points along this stream (see Fig. 2):  
103 SC-1 (sampling point located at the origin, 10.032308 N 83.864449 W), SC-2 (10 meters from origin), SC-3 (30  
104 meters from origin), SC-4 (600 meters from origin) and SC-5 (900 meters from origin). At all sampling sites (except  
105 for the rocky source SC-1, where no sediment material was observed) it was possible to collect sediment samples:  
106 specifically three from the second sampling point (SC-2S1, SC-2S2, SC-2S3), three from the third sampling point  
107 (SC-3S1, SC-3S2, SC-3S3), one from the fourth sampling point (SC-4S1) and four from the fifth sampling point  
108 (SC-5S1, SC-5S2, SC-5S3, SC-5S4). The temperature, pH and dissolved oxygen (DO) amounts were measured  
109 with a dissolved oxygen meter Model 50B (Yellow Springs Instrument Company Inc, Ohio, USA). Water samples  
110 for chemical analysis were collected in clean glass bottles, chilled on ice, and stored at 4 °C until analysis.  
111 Samples for analysis of microbial communities were collected in clean and sterile glass bottles, and processed  
112 within less than 24 h.

113

### 114 **Chemical Analysis**

115

116 The water samples were analysed for major anionic and cationic species with an ion-exchange chromatograph  
117 (IC, MIC-II, Metrohm Co., Switzerland) and an inductively-coupled-plasma mass spectrometer (ICP-MS, Agilent  
118 7500 instrument, Agilent Technologies, Tokyo, Japan). Samples were filtered with polycarbonate membrane filters  
119 (0.45 µm) before analysis. The anions were determined with an IC equipped with an anionic exchange resin  
120 (Metrosep A Supp 5 - 100/4.0). Operating conditions were a mobile phase at 33 °C, Na<sub>2</sub>CO<sub>3</sub> (3.2 mM) / NaHCO<sub>3</sub>

121 (1.0 mM) and flow rate 0.7 mL/min. The anions were identified and quantified relative to certified commercial  
122 standards (Certipur® Anion multi-element standard I, II, Merck, Germany). For ICP-MS analysis a certified multi-  
123 element stock solution (Perkin-Elmer Pure Plus standard, product number 9300233) was used. All determinations  
124 were performed in triplicates.

125

## 126 **Total DNA isolation, construction of 16S rRNA gene libraries and Illumina sequencing**

127

128 The three water samples from each sample point (1 L each) were pooled and filtered through a vacuum system  
129 under sterile conditions using a membrane filter (pore size 0.22 µm; Millipore, GV CAT No GVWP04700). To  
130 prevent rupture, another filter membrane (pore size 0.45 µm; Phenex, Nylon Part No AF0-0504) was placed  
131 below. The upper filter was collected and stored at -80 °C until processing. The DNA was extracted from  
132 aseptically cut pieces of the filter with a DNA isolation kit (PowerSoil®, MoBio, Carlsbad, CA, USA) as described  
133 by the manufacturer. Cell lysis was accomplished by two steps of bead beating (FastPrep-24, MP Biomedicals,  
134 Santa Ana, CA, USA) for 30 s at 5.5 m s<sup>-1</sup>. To process the sediments, a homogeneous sample of 500 mg was  
135 sampled and DNA was extracted using the same protocol. For the construction of microbial 16S rRNA amplicon  
136 libraries, the V5-V6 hypervariable regions were PCR-amplified with universal primers 807F and 1050R (Bohorquez  
137 *et al.* 2012). The barcoding of the DNA amplicons and the addition of Illumina adaptors were conducted by PCR  
138 as described previously (Camarinha-Silva *et al.* 2014). The PCR-generated amplicon libraries were subjected to  
139 250 nt paired-end sequencing on a MiSeq platform (Illumina, San Diego, CA, USA).

140

## 141 **Bioinformatic and phylogenetic analysis of 16S rDNA amplicon data**

142

143 Bioinformatic processing was performed as previously described (Schulz *et al.* 2018). Raw reads were merged  
144 with the Ribosomal Database Project (RDP) assembler (Cole *et al.* 2014), obtaining overall 530,413 paired-end  
145 reads. Sequences were aligned within MOTHUR (gotoh algorithm using the SILVA reference database; Schloss *et al.*  
146 *et al.* 2009) and subjected to preclustering (diffs=2) yielding the so-called operational taxonomic units (OTUs) or  
147 phylotypes that were filtered for an average abundance of ≥0.001% and a sequence length ≥250 bp before  
148 analysis. OTUs were taxonomically classified into the SILVA v132 taxonomy (Yilmaz *et al.* 2014) as reported by  
149 the SINA classification tool (Pruesse *et al.* 2012). OTUs were assigned to a taxonomic rank only if their best hit in  
150 the SILVA database (Pruesse *et al.* 2007) had an identity higher than the threshold established by Yarza *et al.*

151 (2014) for that rank (94.5% for genus, 86.5% for family, 82.0% for order, 78.5% for class and 75.0% for phylum).  
152 Moreover, the sequences of some highly abundant OTUs were also manually examined by means of BLASTN  
153 (Altschul *et al.* 1997) against the non-redundant and against the bacterial and archaeal 16S rRNA databases. The  
154 statistical analyses and visualizations were performed in R (R Core Team, 2017). We used Vegan (Oksanen *et al.*  
155 2017) to calculate alpha diversity estimators, non-metric multidimensional scaling analyses, (NMDS), and the  
156 permutational analysis of variance (Permanova) on normalized tables of OTUs (Supplementary Table S1).

157

## 158 **Results and Discussion**

159

### 160 **Physicochemical analysis of San Cayetano stream**

161

162 The pH along the 0.9 km section of the stream studied in San Cayetano (Fig. 1) was acidic (pH of 3) (Table 1) and  
163 the temperature decreased slightly when moving away from the origin (~38° C in SC-1 to ~30° C in SC-5; Fig. 2).  
164 Moreover, a prominent gradient in the oxygen concentration was observed throughout the VARD: in SC-1  
165 conditions were almost anoxic (0.40 mg L<sup>-1</sup> O<sub>2</sub> corresponding to an oxygen saturation of 6.6% at the temperature  
166 and pressure of the sampling site), while at the last sampling point SC-5 water has become oxic (6.06 mg L<sup>-1</sup> O<sub>2</sub>;  
167 81% O<sub>2</sub> saturation). As shown in Fig. 2, San Cayetano has its origin in a rocky outcrop within the forest where  
168 warm underground water emerges. From there, the water flows for about 3 km to its confluence with the Rio Sucio  
169 (Arce-Rodríguez *et al.* 2017). Near the source, very clear water with a depth of about 1.3 m flows smoothly over a  
170 clean gravel riverbed, but about 20 m downriver there is a 6 m high waterfall where a light-brown microbial mat is  
171 formed. From this point on, water flows faster and it is estimated to discharge at a rate of nearly 100 L/s (Baldoni  
172 *et al.* unpublished).

173

174 The chemical analysis of filtered samples (Table 1) revealed the presence of sulfate, iron, manganese, aluminium,  
175 chromium, zinc, arsenic and magnesium at concentrations much greater than of typical freshwater rivers; the  
176 sulfate (~0.87-1.19 g L<sup>-1</sup>) and iron (~35-61 mg L<sup>-1</sup>) levels were particularly high, which is characteristic of volcanic  
177 and ARD environments (Arce-Rodríguez *et al.* 2019). The low [iron]/[sulfate] ratio and the absence of precipitated  
178 iron minerals (see Figs. 2a,b) as it occurs in Rio Sucio with the iron-oxyhydroxysulfate Schwertmannite (Arce-  
179 Rodríguez *et al.* 2017), suggests that much of the sulfate is produced from volcanic sources (*i.e.*, from biotic or  
180 abiotic H<sub>2</sub>S oxidation and SO<sub>2</sub> water reaction) rather than the oxidation of pyrites or other metal sulfides. The

181 moderately high temperature (~38°C) that occurs at the origin of San Cayetano also indicates volcanic influence.  
182 These observations suggest that the extreme conditions observed in San Cayetano might be produced by  
183 discharge products of volcanic or hydrothermal activity into the water bodies of the river, a phenomenon well  
184 described in geology ((Vaselli *et al.* 2010). When gases SO<sub>2</sub> and H<sub>2</sub>S from volcanic origin are intercepted by water  
185 bodies on their way to the surface, various chemical reactions might occur: For example, when SO<sub>2</sub> is discharged  
186 into deep underground water bodies this can produce sulfate and acidic conditions ( $3\text{SO}_2 + 3\text{H}_2\text{O} \rightarrow 2\text{SO}_4^{2-} +$   
187  $\text{H}_2\text{O} + \text{S}^0 + 4\text{H}^+$ ) (Kusakabe *et al.* 2000). On the other hand, if present, H<sub>2</sub>S may be subjected to biotic or abiotic  
188 oxidation to also generate sulfate (e.g.  $\text{H}_2\text{S} + 2\text{O}_2 \rightarrow \text{H}_2\text{SO}_4$ ). In any case, it is clear that the low [iron]/[sulfate]  
189 ratio, reflects that there is a sulfate source other than the dissolution and oxidation of minerals such as pyrite, i.e.  
190 from volcanic origin. For example, in Río Tinto ARD system the [Fe]/[SO<sub>4</sub><sup>2-</sup>] molar ratio is 0.58 at the origin and  
191 only decreases to 0.29 downstream as expected from the 0.5 ratio from oxidation of pyrite FeS<sub>2</sub>; however, in San  
192 Cayetano stream, we measure far lower ratios between 0.07 at the origin and 0.07-0.12 downstream. Our ratios  
193 compare well to the 0.15 and 0.06 ratios at Copahue Volcano's (Urbieta *et al.* 2015).

194

195 Both processes (ARD or volcanic activity) produce acid that favors the dissolution of minerals (e.g. iron oxides,  
196 sulfides and aluminosilicate rocks). This correlates well with the acidic pH of San Cayetano (pH 2.94-3.06) and the  
197 presence of dissolved metals such as aluminum, zinc, arsenic, manganese or chromium. In summary, the  
198 physicochemical parameters suggest that: (i) the selected sampling points describe a gradient of increasing  
199 oxygen concentration starting at the origin with almost anoxic conditions and (ii) San Cayetano has the typical  
200 chemical composition of an ARD environment but with an important contribution of sulfuric acid due to volcanic  
201 processes. For that reason, we have proposed the acronym VARD (volcanic influenced acid rock drainage) to  
202 describe this specific type of ARD ecosystem.

203

#### 204 **The concentrations of dissolved oxygen along the river shapes the microbial community of San Cayetano**

205

206 In spite of the acidic conditions and high concentrations of sulfate, iron and toxic metals, a relatively high diversity  
207 of microorganisms was observed in the San Cayetano VARD. We identified in total 1904 OTUs (excluding  
208 singletons) from 530,310 16S rRNA gene sequences originating from 36 phyla and 177 families from both bacteria  
209 and archaea (Fig. 3 and Supplementary Table 1). According to the relative percentage of sequences, the most  
210 abundant phylogenetic groups were Gammaproteobacteria (40.2%), Euryarchaeota (10.0%), Actinobacteria  
211 (9.1%), Nitrospirae (6.4%) and Firmicutes (6.2%). However, we detected important variations between the

212 different sampling sites (Fig. 3). These results are consistent with the alpha-diversity estimations showing, for  
213 example, that 63% of the samples in San Cayetano presented richness values higher than 500 OTUs, and that  
214 88% of the samples presented values of the Shannon index greater than 3 (Supplementary Figure S1).

215

216 Despite the high abundance of microbes found in San Cayetano, the taxonomic composition of this VARD showed  
217 a remarkable abundance of unclassified microorganisms amongst the most represented OTUs, both in water and  
218 sediment samples. This was specially the case for the water samples taken at the first two sampling points, where  
219 the dissolved oxygen concentrations do not exceed  $0.50 \text{ mg L}^{-1}$ . Nevertheless, we could detect the presence of  
220 microorganisms commonly found in ARD environments like iron-, sulfur-, sulfide- and thiosulfate-oxidizing  
221 bacteria. Furthermore, we determined significant differences in the community structure at the OTU level  
222 (Permanova,  $P=0.001$ ) along the oxygen gradient.

223

224 NMDS and Permanova analyses were consistent at showing the role of oxygen availability in shaping the structure  
225 of the microbial communities in the VARD ecosystem (Fig. 4). We observed a clear separation of the samples  
226 according to the habitat within each oxygen condition. This difference between microbial communities in the water  
227 column respect to those in sediments was significant (Permanova,  $P=0.018$ ). The water samples near the origin  
228 (SC-1 and SC-2) that contain very little concentrations of oxygen reflect a very similar microbial community  
229 amongst each other. The same situation was observed among the sediments obtained in the second sampling  
230 point (SC-2S1, SC-2S2 and SC-2S3). As expected, samples from the third sampling point, containing  
231 intermediate levels of oxygen, are not grouped with SC-1 and SC-2 (low oxygen) nor with SC-4 and SC-5 (high  
232 oxygen). Again the sediments at this point (SC-3S1, SC-3S2 and SC-3S3) are grouped together. Finally, the water  
233 samples of points four and five, as well as their respective sediments are clearly grouped. As already mentioned,  
234 the last two sampling points present very similar aerobic conditions, so it is expected that the microbial community  
235 in these sites will be grouped as shown by the NMDS analysis.

236

237 As mentioned above, in the first sampling point (SC-1), which corresponds to the spring, the waters contain only  
238  $0.40 \text{ mg L}^{-1} \text{ O}_2$ . At this site, the water springs from the subsurface between the rocks. The microbial community of  
239 the water sample (SC-1 in Fig. 5 and Supplementary Table 1) is dominated by an unclassified  
240 Deltaproteobacterium (OTU\_SC0012; 14.8% of the total reads in SC-1), with high (97.2%) similarity to  
241 environmental OTUs obtained from other AMD/ARD environments such as Río Tinto, Spain (NCBI accession



242 FN862110) or the TongLing acid mine drainage and the Dexing Copper Mine in China (NCBI accessions  
243 KC749174 and EF409870, respectively. Interestingly, this Deltaproteobacterium was also similar (96.8%) to the  
244 uncultured phylotype K5\_62 (NCBI accession EF464599), which has been proposed to represent a novel type of  
245 acidophilic sulfate-reducing bacteria (Winch *et al.* 2009). Given the high concentrations of sulfate that exist in the  
246 origin of San Cayetano (~1.19 g L<sup>-1</sup>), the presence of microorganisms capable of using this oxyanion as the  
247 terminal electron acceptor is expected. The second most abundant microorganism in the origin of San Cayetano  
248 (OTU\_SC0019; 14.5%) corresponds to an unclassified bacterium according to our classification methodology. A  
249 closer look into its sequence by means of BLAST revealed that the first 183 nucleotides of the DNA fragment  
250 share 96.7% of similarity with *Sulfobacillus thermosulfidooxidans*, while the rest of the sequence corresponds to a  
251 low complexity, GC-rich DNA region that does not match with any other sequence within the non-redundant  
252 nucleotide collection (Supplementary Table S1). We, therefore, resolved to manually curate the sequence of this  
253 this OTU and we reassign it within genus *Sulfobacillus* (Fig. 5). These bacteria are Gram-positive, moderately  
254 thermophilic, facultative anaerobic (Johnson *et al.* 2008) acidophiles that grow in sulfurous and sulfidic  
255 environments. It has been previously reported that they attach to sulfide mineral surfaces, which may promote  
256 faster sulfide oxidation (Watling, Perrot and Shiers 2008). *Sulfobacillus* species are also involved in ferrous-iron  
257 oxidation (Norris *et al.* 1996; Pina *et al.* 2010). In addition to these two highly represented genera at the origin of  
258 San Cayetano, we identified other microorganisms related to acidophilic, sulfur- and iron-oxidizing bacteria, such  
259 as *Acidithiobacillus* (OTU\_SC0016; 12.5%). This genus includes chemolithotrophic bacteria capable of oxidizing  
260 sulfide to sulfate, coupling this reaction to ferric iron (under anoxic conditions) or oxygen (under oxic conditions)  
261 reduction (Suzuki *et al.* 1990; Pronk and Johnson 1992). Together with *Acidithiobacillus*, another putative  
262 chemolithotrophic sulfur oxidizer from family Hydrogenophilaceae was found in sample SC-1 (OTU\_SC0015;  
263 8.9%). This organism is closely related to a group of bacteria capable to obtain energy by the oxidation of sulfur  
264 compounds with oxygen or nitrate as the terminal electron acceptor, including *Sulfuritortus calidifontis* (93.2% of  
265 similarity according to BLAST), *Annwoodia aquaesulis* (92.8% similarity) and *Thiobacillus thioparus* (92.4%  
266 similarity)(Kojima, Watanabe and Fukui 2017; Boden, Hutt and Rae 2017).

267

268 Two archaea from the order Thermoplasmatales were also detected amongst the most abundant microorganisms  
269 in the water samples from SC-1 (OTU\_SC0008; 6.6% and OTU\_SC0010; 5.0% of total SC-1 reads). Both  
270 phylotypes share high similarity to environmental OTUs detected in other AMD/ARD niches such as the Rio Tinto  
271 (NCBI accession FN862291), the hydrothermal ponds in the Copahue region in Argentina (NCBI accession

272 JX989254) or the Kamchatkan hot springs in Russia (NCBI accession JF317816). Moreover, the closest isolates  
273 in both cases belong to genus *Cuniculiplasma* (Fig. 5 and Supplementary Table 1). Archaea from the order  
274 Thermoplasmatales are considered as extreme thermoacidophiles that generally grow at pH less than 4 (Auernik,  
275 Cooper and Kelly 2008). Specifically, *Cuniculiplasma* is classified as a facultative anaerobic, organotrophic and  
276 mesophilic whose only isolate (*C. divulgatum*) was obtained from acidic streamers formed on the surfaces of  
277 copper-ore-containing sulfidic deposits in south-west Spain and North Wales, UK (Golyshina *et al.* 2016). Other  
278 species of order Thermoplasmatales such as *Thermoplasma acidophilum* (Yasuda *et al.* 1995), *Thermoplasma*  
279 *volcanium* (Seeger *et al.* 1988), *Thermogymnomonas acidicola* (Itoh, Yoshikawa and Takashina 2007), and  
280 *Picrophilus torridus* (Schleper *et al.* 1995; Serour and Antranikian 2002) have been obtained from solfataric  
281 hydrothermal areas or acidic streamers containing sulfidic deposits, i.e. sulfur-rich environments. Thus, it is likely  
282 that the two Thermoplasmatales OTUs found at the spring waters of San Cayetano are also involved in sulfur  
283 metabolism.

284  
285 In the second sampling point (SC-2), just 10 meters from the origin, the content of dissolved oxygen only  
286 undergoes a slight increase (0.50 mg L<sup>-1</sup> O<sub>2</sub>, 7.7% O<sub>2</sub>) so the microbial community does not change drastically. In  
287 this site, the microorganisms found in SC-1, i.e., *Acidithiobacillus* (16.2%), the putative sulfate reducing  
288 Deltaproteobacterium (15.9%), both Thermoplasmatales archaea (OTU\_SC0008; 10.9% and OTU\_SC0010;  
289 8.9%), and the *Sulfobacillus* (6.9%), are maintained in a major proportion. At this sampling point, it was possible to  
290 assess also the microbiota in the sediments. The most abundant microorganism in all the sediment samples at  
291 SC-2 is an unclassified Anaerolineae chloroflexi bacterium (OTU\_SC0006) distantly related to genera *Anaerolinea*  
292 (89.8% similar to *Anaerolinea thermolimos*), *Ornatilinea* (88.0% similar to *Ornatilinea apprima*) and *Caldilinea*  
293 (85.5% similar to *Caldilinea aerophila*). These genera are reported as chemo-organoheterotrophic chloroflexi,  
294 which thrive in very diverse habitats such as hot spring aquifers (Grégoire *et al.* 2011) or anaerobic wastewater  
295 sludge (Sekiguchi *et al.* 2003; Yamada *et al.* 2005). Interestingly, we could also identify the presence of *Geothrix*  
296 in the sediments of sample SC-2 (OTU\_SC0021). Only one species from this genus, *Geothrix fermentans*, has  
297 been isolated to date. It is a strict anaerobe capable to oxidize a wide variety of organic acids with ferric iron  
298 serving as the sole electron acceptor (Coates *et al.* 1999). This organism could play a very important role in the  
299 sediments of the San Cayetano ecosystem, not only by the oxidation of organic matter but also in the dissolution  
300 of iron(III). By doing so, the iron(II) produced by its respiration becomes available for other iron-oxidizing bacteria  
301 along the river course (i.e. *Ferritrophicum* spp., *Leptospirillum* spp., *Acidithrix* spp., *Ferrovum* spp., see below).

302

303 Besides one of the Thermoplasmatales microorganism found also in the water sample (OTU\_SC0008), another  
304 archaeon of the same order appeared as highly abundant in the sediments of SC-2 (OTU\_SC0004; Fig. 5). Albeit  
305 it also belongs to an unclassified species, it shows high (99.2%) similarity to environmental OTUs obtained from  
306 the Kamchatkan hot springs (NCBI accession JF317816) or the sulfuric ponds of the Tatung Volcano area in  
307 Taiwan (NCBI accession FJ797335). The closest isolates from this OTU lie within the *Picrophilus* genus (90.7%  
308 similarity to both *P. torridus* and *P. oshimae* (Schleper *et al.* 1995). These microorganisms represent the most  
309 thermoacidophilic organisms known, with the ability to survive at a pH around 0 (Schleper *et al.* 1995; Fütterer *et al.*  
310 *al.* 2004). Strains of this species were first isolated from a dry solfataric field in Japan (Fütterer *et al.* 2004). Thus,  
311 it is possible that both Thermoplasmatales archaea take some part in the metabolism of sulfur in the sediments at  
312 this sampling point.

313

314 At the third sampling point (30 meters from the source, after a small waterfall) there is a significant change in the  
315 oxygen content (3.77 mg L<sup>-1</sup> O<sub>2</sub>; 58% O<sub>2</sub>) as well as in the microbial community. Interestingly, more than 55% of  
316 the microbial community in the water sample (SC-3) is dominated by two Gammaproteobacteria: a bacterium of  
317 genus *Ferritrophicum* (OTU\_SC0007; 33.2%) characterized for metabolizing iron compounds, and an unclassified  
318 Burkholderiaceae (OTU\_SC0001; 25.1%)(Fig. 5). Of the genus *Ferritrophicum* only one species has been  
319 reported, *F. radicola*, which uses ferrous iron as an energy source for lithotrophic growth. It is a microaerophilic  
320 bacterium isolated from a plant growing in an acid mine drainage system (Weiss *et al.* 2007). Thus, it is highly  
321 possible that the *Ferritrophicum* from San Cayetano participates in the oxidation of dissolved ferrous iron. On the  
322 other hand, representative species of Burkholderiaceae family are very abundant, occupying diverse ecological  
323 niches and performing very diverse metabolic functions (e.g. nitrogen fixation, aromatic compounds catabolism,  
324 etc) (Compant *et al.* 2008). Therefore, it is difficult to assign a specific role to this generalist Betaproteobacterium  
325 in San Cayetano VARD. The *Acidithiobacillus* and the two Thermoplasmatales found in the waters of SC-2 were  
326 also present in this sample in lower abundance.

327

328 The sediments of SC-3 also show the presence of the same Burkholderiaceae bacterium (OTU\_SC0001) found in  
329 the water sample, as well as the Thermoplasmatales archaea (OTU\_SC0004 and OTU\_SC0008, respectively)  
330 found in the sediments of SC-2 (Fig. 5). The presence of the two archaea suggests their capacity to adapt to a  
331 wide range of oxygen conditions. In addition, we found a highly abundant Gammaproteobacterium that clusters

332 within the Acidithiobacillaceae group RCP1-48 (OTU\_SC0009). Members from this group have been previously  
333 detected in the sediments of other AMD habitats like Rio Tinto (Sánchez-Andrea *et al.* 2011) or Los Ruedos  
334 mercury underground mine in Spain (Mesa *et al.* 2017), and it has been suggested that they could have an  
335 important role in the oxidation of iron and sulfur compounds (Mesa *et al.* 2017). Besides those microorganisms,  
336 these sediments host two other highly abundant iron oxidizing-bacteria: A representative species of genus  
337 *Leptospirillum* (OTU\_SC0003), and the same *Ferritrophicum* sp. found in the water sample. Particularly, the  
338 presence of *Leptospirillum* has been widely reported in acid mine drainage (AMD) environments. They catalyze  
339 the ferrous iron oxidation, accelerating iron(III)-mediated oxidative dissolution of sulfide minerals and thus the  
340 formation of AMD (Goltsman *et al.* 2013). Due to its extraordinary characteristics, *Leptospirillum* species have  
341 been used throughout the world in industrial bioleaching operations (Sand *et al.* 1992; Issotta *et al.* 2016). In  
342 summary, at sampling point SC-3 we observe an important increase of heterotrophic and iron-oxidizing bacteria,  
343 while anaerobic sulfur oxidizers drastically decrease (compared to samples SC-1 and SC-2). This observation also  
344 correlates with the increase of oxygen concentration at SC-3 (see table 1 and Fig. 4).

345

346 Finally, the sampling points four and five (600 m and 900 m from the origin, respectively) have similar high oxygen  
347 contents and very similar microbial composition (Figs 4 and 5). The oxygen content was 5.85 mg L<sup>-1</sup> O<sub>2</sub> (82% O<sub>2</sub>)  
348 and 6.06 mg L<sup>-1</sup> O<sub>2</sub> (81% O<sub>2</sub>) respectively. The microbial community in those waters is also dominated by the  
349 same Burkholderiaceae bacterium found in SC-3 (36.9% in SC-4 and 30.0% in SC-5), followed by the  
350 *Leptospirillum* sp. present in the sediments of SC-3 (18.3% in SC-4 and 11.4% in SC-5). In the third place, we  
351 detected large quantities of the heterotrophic acidophile *Acidithrix* (OTU\_SC0005; 7.58% in SC-4 and 11.88% in  
352 SC-5). To the best of our knowledge, *Acidithrix ferrooxidans* is the unique species from this genus that has been  
353 described to date. This bacterium is capable to catalyze the dissimilatory oxidation of ferrous iron under aerobic  
354 conditions, and the reduction of ferric iron under micro-aerobic and anaerobic conditions (Jones and Johnson  
355 2015). Given the oxic nature of SC-4 and SC-5, it is presumable that the *Acidithrix* detected in both water samples  
356 contributes to the oxidation of ferrous iron. These conditions are very appropriate also for the obligate aerobe  
357 *Leptospirillum* sp. (see above) and for other iron-oxidizing bacteria present in these samples in minor abundance  
358 (i.e *Ferritrophicum* spp. and *Ferrovum* spp.). In addition, other heterotrophic bacteria from the genera  
359 *Trichococcus* and *Acidocella* were found in the water from sampling points SC-4 and SC-5, respectively.

360

361 Finally, the sediments obtained from SC-4 and SC-5 showed a similar microbial composition (Fig. 5). The most  
362 prominent organism in both samples is a Gammaproteobacterium of the genus *Metallibacterium* (OTU\_SC0002).  
363 Once again, this genus has only one reported species (*M. scheffleri*) and has been very poorly studied. Among the  
364 few known metabolic functions of this species, it is known that it is capable of reducing ferric iron, but does not  
365 oxidize ferrous iron (Ziegler *et al.* 2013). We found also a large abundance of some of the microorganisms  
366 identified in the water samples from sampling points SC-4 and SC-5, such as the Burkholderiaceae  
367 Betaproteobacterium, *Acidithrix* sp., *Leptospirillum* sp. and *Ferrovum* sp. Other microorganisms found in the  
368 sediments of SC-5 were a Gammaproteobacterium (OTU\_SC0013) from the uncultured group KF-JG30-C25 and  
369 another Actinobacterium (OTU\_SC0020) whose closest isolate (91.4% similarity according to BLAST) is the  
370 heterotrophic iron(III)-reducer *Aciditerrimonas ferrireducens* (Itoh *et al.* 2011). Specifically, members of KF-JG30-  
371 C25 group have been detected in AMD habitats such as the uranium mining waste pile at Johanngeorgenstadt in  
372 Germany (Selenska-Pobell 2002).

373

## 374 **Conclusions**

375

376 This work reports the microbiological composition of the volcanic influenced acid rock drainage known as San  
377 Cayetano (northeast of Irazu volcano, Costa Rica). The low [iron]/[sulfate] ratio suggest that most of the sulfuric  
378 acid in this VARD is of volcanic origin, possibly due to the disproportionation reaction of SO<sub>2</sub> and biotic or abiotic  
379 H<sub>2</sub>S oxidation in the groundwater. The moderately high temperature of the water at the spring of San Cayetano is  
380 also consistent with underground mixing with volcanic water. We analyzed the microbial composition of water and  
381 sediment samples along 900 meters from the origin of the river. Interestingly, we found a remarkable abundance  
382 of a yet not-described diversity of microorganisms amongst the most represented taxa thriving in San Cayetano  
383 VARD. Nevertheless, we could also identify the presence of bacteria and archaea that, along with the chemistry of  
384 the site, resembles the composition of typical ARD environments. The structure of the microbial community in San  
385 Cayetano undergoes important changes as a function of the oxygen gradient observed in the distinct water  
386 samples. At the origin of the river (SC-1 and SC-2), the microbial profile is dominated mainly by putative  
387 anaerobic, sulfur-oxidizing microorganisms such as *Sulfobacillus* sp., *Acidithiobacillus* sp., the putative sulfate  
388 reducing Deltaproteobacterium and the *Hydrogenophilaceae* Gammaproteobacterium. Their presence at the first  
389 two sampling points, suggest that these microorganisms are likely involved in both sulfate reduction as well sulfide  
390 oxidation, completing the sulfur cycle. At the third sampling point (SC-3), the oxygen content increases eight-fold

391 (from 0.40 mg L<sup>-1</sup> to 3.77 mg L<sup>-1</sup>), also generating a drastic change in the microbial community. Most of the sulfur-  
392 oxidizing taxa found at the origin of the river are substituted by iron-oxidizers (*Ferritrophicum spp.*, *Leptospirillum*  
393 *sp.*) and heterotrophic microorganisms (Burkholderiaceae Betaproteobacterium). After 600 meters downstream  
394 from the origin of San Cayetano, the river is completely oxygenated. Consequently, the last two samples (SC-4  
395 and SC-5) are totally dominated by aerobic microorganisms, mostly related to heterotrophic metabolism  
396 (Burkholderiaceae Betaproteobacterium, *Trichococcus sp.* *Acidoceella sp.*) or iron-oxidation (*Leptospirillum sp.*,  
397 *Acidithrix sp.*, *Ferritrophicum spp.*, *Ferrovum spp.*). Our data are consistent with the notion that the initial volcanic  
398 chemistry of the aquifer is fundamentally modified by the microbial metabolism and by the increase of oxygen  
399 along the river course until its confluence with the previously characterized Rio Sucio (Arce-Rodriguez *et al.* 2017).

400

401 Over the 900 meters course of the stream analyzed, we were able to find both aerobic and anaerobic organisms  
402 carrying out many different metabolic activities (*i.e.* sulfur- and iron- oxidation/reduction, nitrogen metabolism,  
403 carbon oxidation, etc.). Furthermore, these organisms have to cope with the high concentration of heavy metals  
404 such as arsenic, chromium or zinc. Taking also into account the large diversity of unclassified microorganisms  
405 found along San Cayetano, it is reasonable to presume that this untapped ecosystem is endowed with metabolic  
406 functions and enzymatic activities with a biotechnological interest that could be further exploited. This work also  
407 contributes to the knowledge of volcanic and ARD environments in which the conditions are created only by  
408 natural factors which contrasts with the majority of published works on ARD environments in the world which have  
409 been influenced by human activity.

410

411

## 412 **Funding**

413

414 This work was supported by The Vice-rectory of Research of Universidad de Costa Rica (project number VI 809-  
415 B6-524), the Costa Rican Ministry of Science, Technology and Telecommunication (MICITT) and Federal Ministry  
416 of Education and Research (BMBF) (project VolcanZyme contract No FI-255B-17) and by the ERC grant IPBSL  
417 (ERC250350-IPBSL). F.P-S. is supported by the Spanish Economy and Competitiveness Ministry (MINECO) grant  
418 CTM2016-80095-C2-1-R.

419

## 420 **Acknowledgements**

421

422 We thank Carlos Rodriguez of Centro de Investigación en Contaminación Ambiental (CICA) for the help in the  
423 chemical analysis. We also are grateful to Solange Voysest for help in the design of some figures.

424

425

## 426 **References**

- 427 Altschul SF, Madden TL, Schäffer AA et al. Gapped BLAST and PSI-BLAST: a new generation of protein  
428 database search programs. *Nucleic Acids Res* 1997; **25**:3389-3402.
- 429 Amils R, Fernández-Remolar D, the IPBSL Team. Río Tinto: A geochemical and mineralogical terrestrial analogue  
430 of Mars. *Life* 2014;**4**:511–34.
- 431 Arce-Rodríguez A, Puente-Sánchez F, Avendaño R et al. Pristine but metal-rich Río Sucio (Dirty River) is  
432 dominated by *Gallionella* and other iron-sulfur oxidizing microbes. *Extremophiles* 2017;**21**:235–43.
- 433 Arce-Rodríguez A, Puente-Sánchez F, Avendaño R et al. Thermoplasmatales and sulfur-oxidizing bacteria  
434 dominate the microbial community at the surface water of a CO<sub>2</sub>-rich hydrothermal spring located in Tenorio  
435 Volcano National Park, Costa Rica. *Extremophiles* 2019;**23**:177–87.
- 436 Auernik KS, Cooper CR, Kelly RM. Life in hot acid: pathway analyses in extremely thermoacidophilic archaea.  
437 *Curr Opin Biotechnol* 2008;**19**:445–53.
- 438 Baker BJ, Banfield JF. Microbial communities in acid mine drainage. *FEMS Microbiol Ecol* 2003;**44**:139–52.
- 439 Boden R, Hutt LP, Rae AW. Reclassification of *Thiobacillus aquaesulis* (Wood & Kelly, 1995) as *Annwoodia*  
440 *aquaesulis* gen. nov., comb. nov., transfer of *Thiobacillus* (Beijerinck, 1904) from the Hydrogenophilales to  
441 the Nitrosomonadales, proposal of Hydrogenophilalia class. nov. within the 'Proteobacteria', and four new  
442 families within the orders Nitrosomonadales and Rhodocyclales. *Int J Syst Evol Microbiol* 2017;**67**:1191-  
443 1205.
- 444 Bohorquez LC, Delgado-Serrano L, López G et al. In-depth characterization via complementing culture-  
445 independent approaches of the microbial community in an acidic hot spring of the Colombian Andes. *Microb*  
446 *Ecol* 2012;**63**:103–15.
- 447 Camarinha-Silva A, Jáuregui R, Chaves-Moreno D et al. Comparing the anterior nare bacterial community of two  
448 discrete human populations using Illumina amplicon sequencing. *Environ Microbiol* 2014;**16**:2939–52.
- 449 Castellón E, Martínez M, Madrigal-Carballo S et al. Scattering of Light by Colloidal Aluminosilicate Particles  
450 Produces the Unusual Sky-Blue Color of Río Celeste (Tenorio Volcano Complex, Costa Rica). *PLoS One*  
451 2013;**8**:e75165.
- 452 Coates JD, Ellis DJ, Gaw C V et al. *Geothrix fermentans* gen. nov., sp. nov., a novel Fe(III)-reducing bacterium  
453 from a hydrocarbon-contaminated aquifer. *Int J Syst Bacteriol* 1999;**49**:1615–22.
- 454 Cole JR, Wang Q, Fish JA et al. Ribosomal Database Project: Data and tools for high throughput rRNA analysis.  
455 *Nucleic Acids Res* 2014;**42**:633–42.



- 456 Compant S, Nowak J, Coenye T et al. Diversity and occurrence of Burkholderia spp. in the natural environment.  
457 *FEMS Microbiol Rev* 2008;**32**:607–26.
- 458 Dold B, Gonzalez-Toril E, Aguilera A et al. Acid Rock Drainage and Rock Weathering in Antarctica: Important  
459 Sources for Iron Cycling in the Southern Ocean. *Environ Sci Technol* 2013;**47**:6129–36.
- 460 Fernández-Remolar DC, Rodriguez N, Gomez F. Geological record of an acidic environment driven by iron  
461 hydrochemistry: The Tinto River system. *J Geophys Res* 2003;**108**:5080.
- 462 Fütterer O, Angelov A, Liesegang H et al. Genome sequence of *Picrophilus torridus* and its implications for life  
463 around pH 0. *Proc Natl Acad Sci* 2004;**101**:9091–6.
- 464 García-Moyano A, González-Toril E, Aguilera Á et al. Comparative microbial ecology study of the sediments and  
465 the water column of the Río Tinto, an extreme acidic environment. *FEMS Microbiol Ecol* 2012;**81**:303–14.
- 466 Goltsman DSA, Dasari M, Thomas BC et al. New Group in the Leptospirillum Clade: Cultivation-Independent  
467 Community Genomics, Proteomics, and Transcriptomics of the New Species “Leptospirillum Group IV UBA  
468 BS.” *Appl Environ Microbiol* 2013;**79**:5384–93.
- 469 Golyshina O V., Lünsdorf H, Kublanov I V. et al. The novel extremely acidophilic, cell-wall-deficient archaeon  
470 *Cuniculiplasma divulgatum* gen. nov., sp. nov. represents a new family, Cuniculiplasmataceae fam. nov., of  
471 the order Thermoplasmatales. *Int J Syst Evol Microbiol* 2016;**66**:332–40.
- 472 González-Toril E, Aguilera A, Rodriguez N et al. Microbial ecology of Río Tinto, a natural extreme acidic  
473 environment of bihydrometallurgical interest. *Hydrometallurgy* 2010;**104**:329–33.
- 474 González-Toril E, Llobet-Brossa E, Casamayor EO et al. Microbial ecology of an extreme acidic environment, the  
475 Tinto River. *Appl Environ Microbiol* 2003;**69**:4853–65.
- 476 González-Toril E, Santofimia E, Blanco Y et al. Pyrosequencing-based assessment of the microbial community  
477 structure of Pastoruri glacier area (Huascarán National Park, Perú), a natural extreme acidic environment.  
478 *Microb Ecol* 2015;**70**:936–47.
- 479 Grégoire P, Bohli M, Cayol JL et al. *Caldilinea tarbellica* sp. nov., a filamentous, thermophilic, anaerobic bacterium  
480 isolated from a deep hot aquifer in the Aquitaine Basin. *Int J Syst Evol Microbiol* 2011;**61**:1436–41.
- 481 Issotta F, Galleguillos PA, Moya-Beltrán A et al. Draft genome sequence of chloride-tolerant *Leptospirillum*  
482 *ferriphilum* Sp-CI from industrial bioleaching operations in northern Chile. *Stand Genomic Sci* 2016;**11**:1–7.
- 483 Itoh T, Yamanoi K, Kudo T et al. *Aciditerrimonas ferrireducens* gen. nov., sp. nov., an iron-reducing  
484 thermoacidophilic actinobacterium isolated from a solfataric field. *Int J Syst Evol Microbiol* 2011;**61**:1281-5.
- 485 Itoh T, Yoshikawa N, Takashina T. *Thermogymnomonas acidicola* gen. nov., sp. nov., a novel thermoacidophilic,

- 486 cell wall-less archaeon in order Thermoplasmatales, isolated from a solfataric soil in Hakone, Japan. *Int J*  
487 *Syst Evol Microbiol* 2007;**57**:2557–61.
- 488 Johnson DB, Bacelar-Nicolau P, Okibe N et al. *Ferrimicrobium acidiphilum* gen. nov., sp. nov. and *Ferrithrix*  
489 *thermotolerans* gen. nov., sp. nov.: heterotrophic, iron-oxidizing, extremely acidophilic actinobacteria. *Int J*  
490 *Syst Evol Microbiol* 2009;**59**:1082–9.
- 491 Johnson DB, Joulian C, D'Hugues P et al. *Sulfobacillus benefaciens* sp. nov., an acidophilic facultative anaerobic  
492 Firmicute isolated from mineral bioleaching operations. *Extremophiles* 2008;**12**:789–98.
- 493 Jones RM, Johnson DB. *Acidithrix ferrooxidans* gen. nov., sp. nov.; a filamentous and obligately heterotrophic,  
494 acidophilic member of the Actinobacteria that catalyzes dissimilatory oxido-reduction of iron. *Res Microbiol*  
495 2015;**166**:111-120.
- 496 Kojima H, Watanabe M, Fukui M. *Sulfuritortus calidifontis* gen.nov., sp. nov., a sulfur oxidizer isolated from a hot  
497 spring microbial mat. *Int J Syst Evol Microbiol* 2017;**67**:1355-8.
- 498 Kusakabe M, Komoda Y, Takano B et al. Sulfur isotopic effects in the disproportionation reaction of sulfur dioxide  
499 in hydrothermal fluids: implications for the  $\delta^{34}\text{S}$  variations of dissolved bisulfate and elemental sulfur from  
500 active crater lakes. *J Volcanol Geotherm Res* 2000;**97**:287-307.
- 501 López-Archilla AI, Gérard E, Moreira D et al. Macrofilamentous microbial communities in the metal-rich and acidic  
502 River Tinto, Spain. *FEMS Microbiol Lett* 2004;**235**:221–8.
- 503 Mesa V, Gallego JLR, González-Gil R et al. Bacterial, archaeal, and eukaryotic diversity across distinct  
504 microhabitats in an acid mine drainage. *Front Microbiol* 2017;**8**:1756.
- 505 Norris PR, Clark DA, Owen JP et al. Characteristics of *Sulfobacillus acidophilus* sp. nov. and other moderately  
506 thermophilic mineral-sulphide-oxidizing bacteria. *Microbiology* 1996;**142**:775–83.
- 507 Oksanen J, Blanchet FG, Friendly M, et al. Vegan: Community Ecology Package. R package Version 2.4-3. 2017  
508 <https://CRAN.R-project.org/package=vegan>.
- 509 Pina PS, Oliveira VA, Cruz FLS et al. Kinetics of ferrous iron oxidation by *Sulfobacillus thermosulfidooxidans*.  
510 *Biochem Eng J* 2010;**51**:194–7.
- 511 Pronk JT, Johnson DB. Oxidation and reduction of iron by acidophilic bacteria. *Geomicrobiol J* 1992;**10**:79.
- 512 Pruesse E, Peplies J, Glöckner FO. SINA: accurate high-throughput multiple sequence alignment of ribosomal  
513 RNA genes. *Bioinformatics* 2012; **28**:1823-9.
- 514 Pruesse, E., Quast, C., Knittel, K., et al. SILVA: a comprehensive online resource for quality checked and aligned  
515 ribosomal RNA sequence data compatible with ARB. *Nucleic Acids Res* 2007; **35**:7188-96.

- 516 R Core Team. R: A language and environment for statistical computing. R foundation for statistical computing,  
517 Vienna, Austria. 2017 URL <http://www.R-project.org/>.
- 518 Sánchez-Andrea I, Knittel K, Amann R et al. Quantification of Tinto River sediment microbial communities:  
519 Importance of sulfate-reducing bacteria and their role in attenuating acid mine drainage. *Appl Environ*  
520 *Microbiol* 2012;**78**:4638–45.
- 521 Sánchez-Andrea I, Rodríguez N, Amils R et al. Microbial diversity in anaerobic sediments at Río Tinto, a naturally  
522 acidic environment with a high heavy metal content. *Appl Environ Microbiol* 2011;**77**:6085–93.
- 523 Sand W, Rohde K, Sobotke B et al. Evaluation of *Leptospirillum ferrooxidans* for leaching. *Appl Environ Microbiol*  
524 1992;**58**:85–92.
- 525 Schleper C, Puehler G, Holz I et al. *Picrophilus* gen. nov., fam. nov.: a novel aerobic, heterotrophic,  
526 thermoacidophilic genus and family comprising archaea capable of growth around pH 0. *J Bacteriol*  
527 1995;**177**:7050–9.
- 528 Schloss PD, Westcott SL, Ryabin T et al. Introducing mothur: Open-source, platform-independent, community-  
529 supported software for describing and comparing microbial communities. *Appl Environ Microbiol*  
530 2009;**75**:7537–41.
- 531 Schulz C, Schütte K, Koch N et al. The active bacterial assemblages of the upper GI tract in individuals with and  
532 without Helicobacter infection. *Gut* 2018;**67**:216–25.
- 533 Segerer A, Langworthy TA, Stetter KO. *Thermoplasma acidophilum* and *Thermoplasma volcanium* sp. nov. from  
534 Solfatara Fields. *Syst Appl Microbiol* 1988;**10**:161–71.
- 535 Sekiguchi Y, Yamada T, Hanada S et al. *Anaerolinea thermophila* gen. nov., sp. nov. and *Caldilinea aerophila*  
536 gen. nov., sp. nov., novel filamentous thermophiles that represent a previously uncultured lineage of the  
537 domain bacteria at the subphylum level. *Int J Syst Evol Microbiol* 2003;**53**:1843–51.
- 538 Selenska-Pobell S. Chapter 8 Diversity and activity of bacteria in uranium waste piles. *Radioactivity in the*  
539 *Environment* 2002; **2**:225-54.
- 540 Serour E, Antranikian G. Novel thermoactive glucoamylases from thermoacidophilic archea *Thermoplasma*  
541 *acidophilum*, *Picrophilus torridus* and *Picrophilus oshimae*. *Antonie van Leeuwenhoek*, 2002;**81**:73–83.
- 542 Suzuki I, Takeuchi TL, Yuthasastrakosol TD et al. Ferrous iron and sulfur oxidation and ferric iron reduction  
543 activities of *Thiobacillus ferrooxidans* are affected by growth on ferrous iron, sulfur, or a sulfide ore. *Appl*  
544 *Environ Microbiol* 1990;**56**:1620–6.
- 545 Urbieta M, Porati G, Segretin A et al. Copahue geothermal system: A volcanic environment with rich extreme

- 546 prokaryotic biodiversity. *Microorganisms* 2015;**3**:344–63.
- 547 Vaselli O, Tassi F, Duarte E et al. Evolution of fluid geochemistry at the Turrialba volcano (Costa Rica) from 1998  
548 to 2008. *Bull Volcanol* 2010;**72**:397-410.
- 549 Watling HR, Perrot FA, Shiers DW. Comparison of selected characteristics of *Sulfobacillus* species and review of  
550 their occurrence in acidic and bioleaching environments. *Hydrometallurgy* 2008;**93**:57–65.
- 551 Weiss J V., Rentz JA, Plaia T et al. Characterization of neutrophilic Fe(II)-oxidizing bacteria isolated from the  
552 rhizosphere of wetland plants and description of *Ferritrophicum radicola* gen. nov. sp. nov., and  
553 *Sideroxydans paludicola* sp. nov. *Geomicrobiol J* 2007;**24**:559–70.
- 554 Winch S, Mills HJ, Kostka JE et al. Identification of sulfate-reducing bacteria in methylmercury-contaminated mine  
555 tailings by analysis of SSU rRNA genes. *FEMS Micro Ecol* 2009;**68**:94-107.
- 556 Yamada T, Sekiguchi Y, Imachi H et al. Diversity, localization, and physiological properties of filamentous  
557 microbes belonging to Chloroflexi subphylum I in mesophilic and thermophilic methanogenic sludge granules.  
558 *Microbiology* 2005;**71**:7493–503.
- 559 Yarza P, Yilmaz P, Pruesse E et al. Uniting the classification of cultured and uncultured bacteria and archaea  
560 using 16S rRNA gene sequences. *Nat Rev Microbiol* 2014;**12**:635-45.
- 561 Yasuda M, Oyaizu H, Yamagishi A et al. Morphological variation of new *Thermoplasma acidophilum* isolates from  
562 Japanese hot springs. *Appl Environ Microbiol* 1995;**61**:3482–5.
- 563 Yilmaz P, Parfrey LW, Yarza P et al. The SILVA and "All-species Living Tree Project (LTP)" taxonomic  
564 frameworks. *Nucleic Acids Res* 2014;**42**:D643-48.
- 565 Ziegler S, Waidner B, Itoh T et al. *Metallibacterium scheffleri* gen. nov., sp. nov., an alkalinizing  
566 gammaproteobacterium isolated from an acidic biofilm. *Int J Syst Evol Microbiol* 2013;**63**:1499–504.
- 567
- 568
- 569
- 570
- 571
- 572
- 573
- 574
- 575
- 576
- 577

578 **Tables**

579  
580 **Table 1. Physical properties and chemical composition of San Cayetano.**

581

| <b>Property/element/ion</b>                        | <b>SC-1</b> | <b>SC-2</b> | <b>SC-3</b> | <b>SC-4</b> | <b>SC-5</b> |
|----------------------------------------------------|-------------|-------------|-------------|-------------|-------------|
| Temperature (°C) / ± 0.1                           | 38.0        | 38.2        | 37.8        | 32.7        | 29.7        |
| pH / ± 0.1                                         | 3.0         | 2.9         | 3.0         | 3.1         | 3.0         |
| Dissolved oxygen<br>(mg L <sup>-1</sup> ) / ± 0.01 | 0.40        | 0.50        | 3.77        | 5.85        | 6.06        |
| Aluminum (mg L <sup>-1</sup> ) ± 5                 | 41          | 33          | 41          | 34          | 45          |
| Arsenic (µg L <sup>-1</sup> ) ± 0.7                | 19.2        | 20.8        | 20.7        | 12.9        | 11.3        |
| Cadmium (µg L <sup>-1</sup> )                      | < 0.11      | < 0.11      | < 0.11      | < 0.11      | < 0.11      |
| Calcium (mg L <sup>-1</sup> ) ± 2                  | 4           | 4           | 4           | 4           | 3           |
| Chloride (mg L <sup>-1</sup> ) ± 10                | 246         | 203         | 227         | 200         | 222         |
| Copper (mg L <sup>-1</sup> )                       | < 0.10      | < 0.10      | < 0.10      | < 0.10      | < 0.10      |
| Chromium (µg L <sup>-1</sup> ) / ± 2               | 30          | 33          | 33          | 32          | 29          |
| Fluoride (mg L <sup>-1</sup> )                     | <0.09       | <0.09       | <0.09       | <0.09       | <0.09       |
| Iron (mg L <sup>-1</sup> ) / ± 2                   | 45          | 51          | 61          | 40          | 35          |
| Magnesium (mg L <sup>-1</sup> ) ± 3                | 58          | 64          | 64          | 63          | 59          |
| Manganese (mg L <sup>-1</sup> ) ± 0.06             | 1.98        | 2.05        | 1.98        | 2.00        | 2.02        |
| Nickel (µg L <sup>-1</sup> ) / ± 2                 | 6           | 10          | 8           | 10          | 10          |
| Nitrate (mg L <sup>-1</sup> )                      | < 0.10      | < 0.10      | < 0.10      | < 0.10      | < 0.10      |
| Lead (µg L <sup>-1</sup> )                         | < 1.2       | < 1.2       | < 1.2       | < 1.2       | < 1.2       |
| Potassium (mg L <sup>-1</sup> ) ± 0.6              | 31.8        | 34.2        | 33.4        | 35.0        | 33.8        |
| Sodium (mg L <sup>-1</sup> ) ± 2                   | 73          | 79          | 78          | 78          | 75          |
| Sulfate (mg L <sup>-1</sup> ) ± 50                 | 1190        | 950         | 883         | 870         | 874         |
| Zinc (µg L <sup>-1</sup> ) ± 10                    | 115         | 109         | 141         | 119         | 121         |

582

583

584

585 **Figure legends**

586

587 **Fig. 1 San Cayetano stream in Central Mountain Range, Costa Rica.** The San Cayetano stream is located in  
588 the Central Valley, next to the Irazú volcano. This stream has a length of about 3 km to its mouth in the Rio Sucio.

589

590 **Fig. 2 Sampling points from San Cayetano stream.** Water and sediment samples were taken in five places  
591 along the river: at the origin (SC-1), ten meters from the origin (SC-2), 30 meters from origin (SC-3), 600 meters  
592 from origin (SC-4) and 900 meters from origin (SC-5). As shown in the figure, between sampling points a gradient  
593 occurs in the oxygen content.

594

595 **Fig. 3 Taxonomic composition of San Cayetano.** Relative abundance of bacterial and archaeal organisms to  
596 the phylum level. The OTUs were taxonomically classified into the RDP taxonomy as reported by the SINA  
597 classification tool, as described in Materials and Methods. The water samples at each of the sampling points are  
598 identified as SC-1 to SC-5. Sediment samples are identified with legends SC-2S1 to SC-5S4.

599

600 **Fig. 4 Non-metric multidimensional scaling analysis of the prokaryotic communities in San Cayetano**  
601 **volcanic influenced acid rock drainage.** A clustering of communities according to the oxygen content of the  
602 samples and also by the habitat (water column versus sediment) is shown. The NMDS and the Permanova  
603 analyses were performed with the package Vegan.

604

605 **Fig. 5 Heat map representing the most abundant genera in each sample.** The heat map depicts the relative  
606 percentage of 16S rRNA gene sequences assigned to each genus (y axis) across the 16 samples analysed (x  
607 axis). Square colors shifted towards black indicate higher abundance.

608

Sucio River

Map Location

SC-5  
SC-4  
SC-1, 2, 3

Landslide

Sucio River  
source

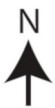

0 1 2 3 km

----- Irazú Volcano Road

- - - - - Farm Road

————— Sucio River

⊙ Irazu Volcano crater

● Sampling Point

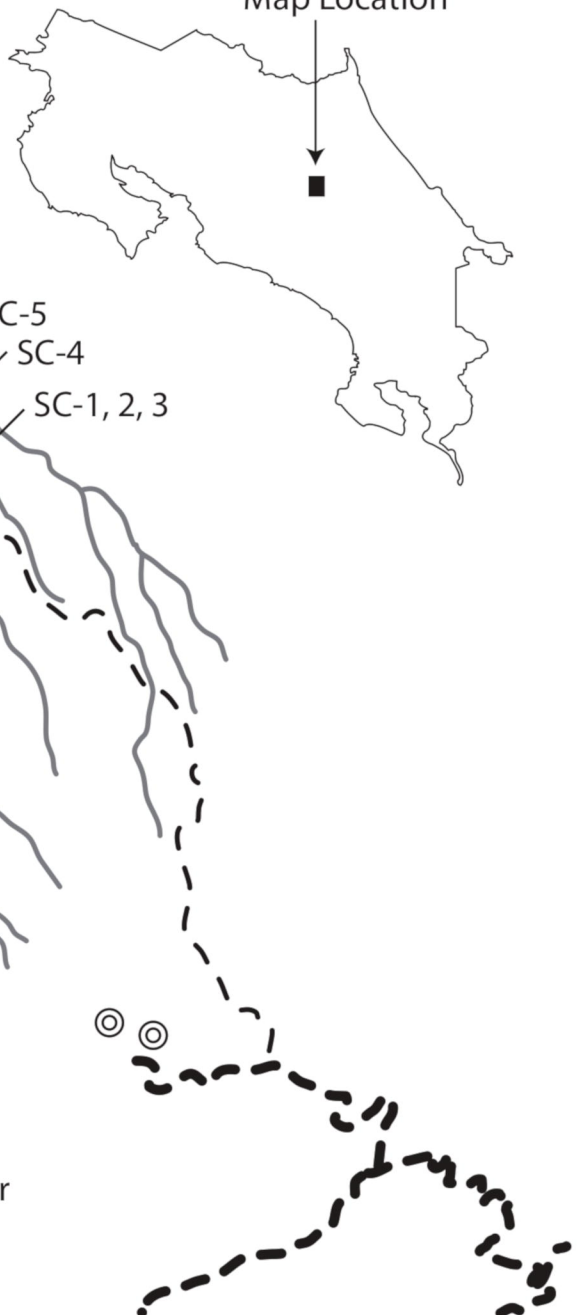

SC-1



38.0 °C      0.40 mg/L O<sub>2</sub>

SC-2      10 m



38.2 °C      0.50 mg/L O<sub>2</sub>

SC-3      30 m



37.8 °C      3.77 mg/L O<sub>2</sub>

SC-4      600 m



32.7 °C      5.85 mg/L O<sub>2</sub>

SC-5      900 m



29.7 °C      6.06 mg/L O<sub>2</sub>



0.4-0.5 mg/l O<sub>2</sub>

3.7 mg/l O<sub>2</sub>

5.8-6.1 mg/l O<sub>2</sub>

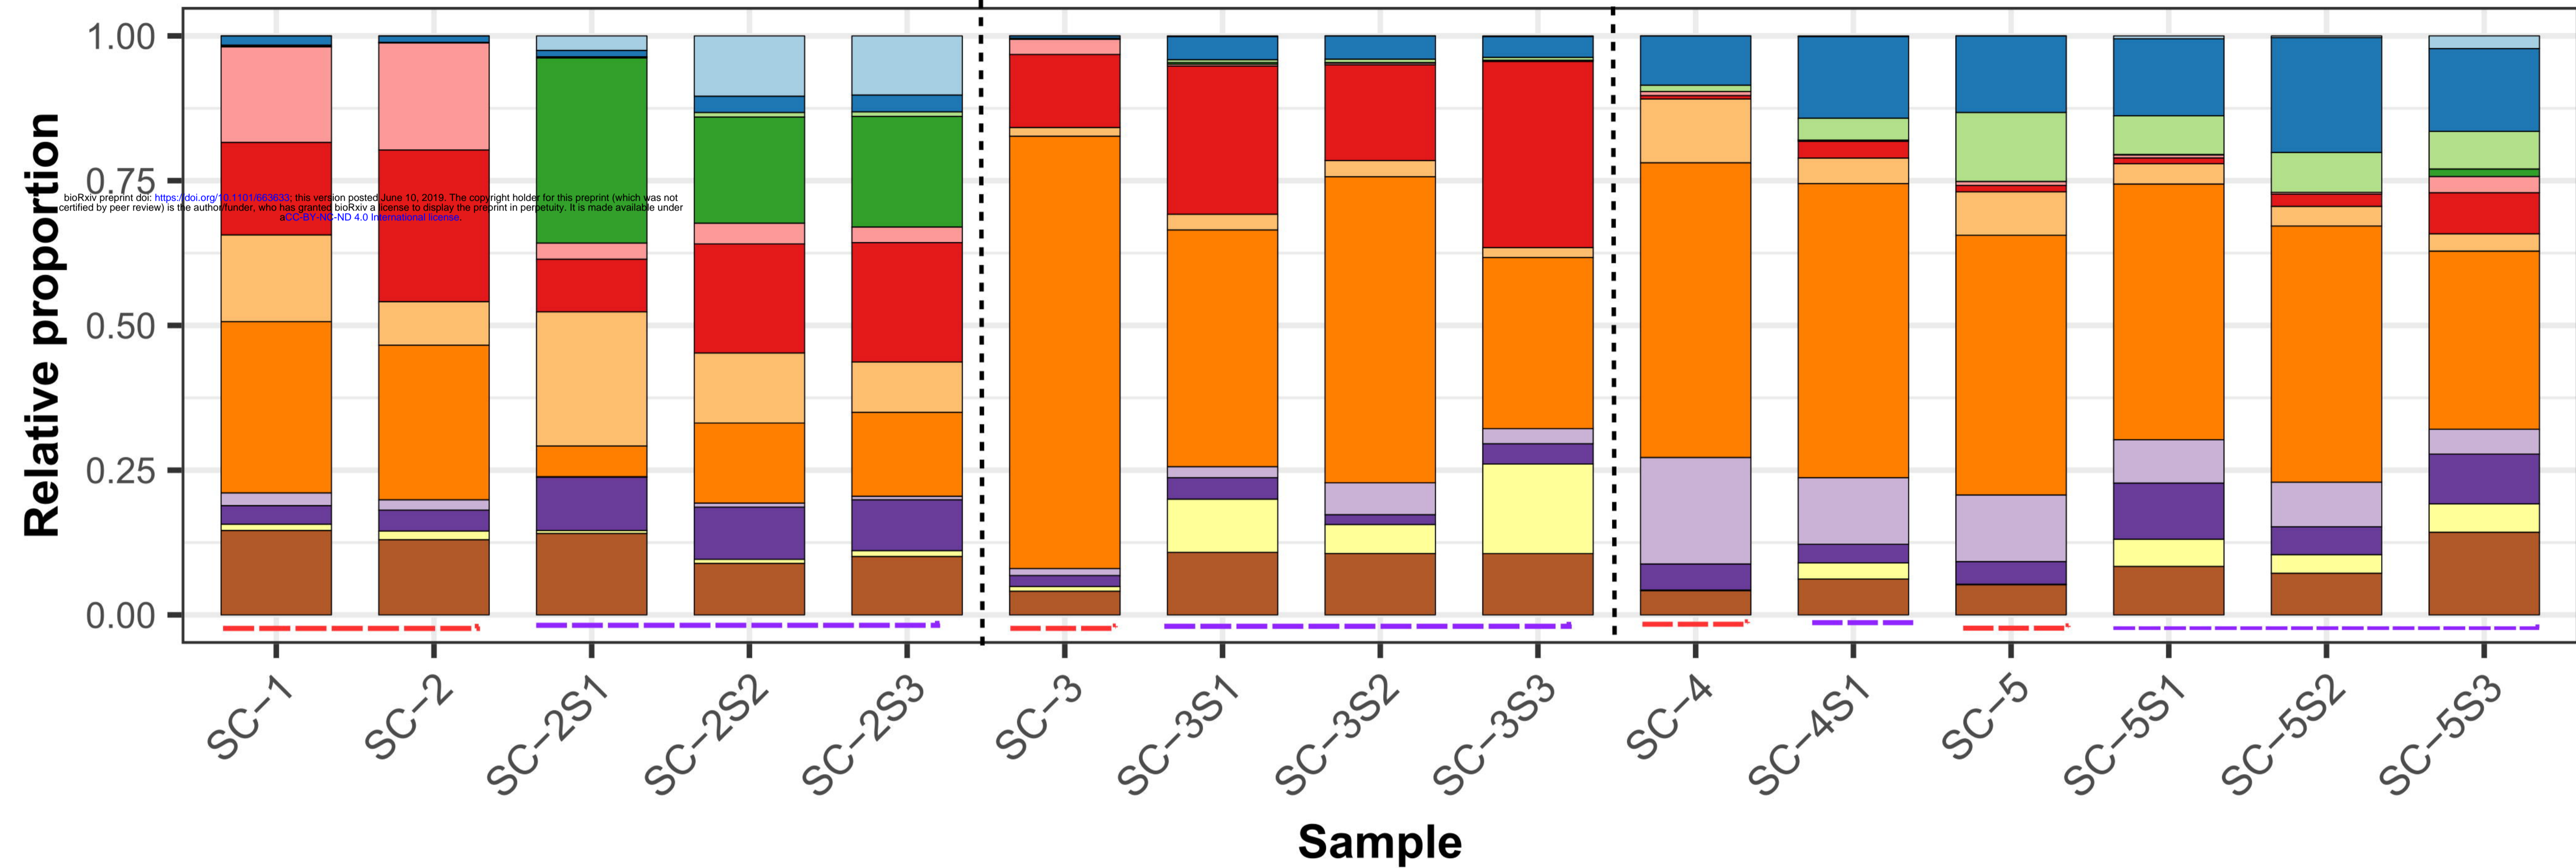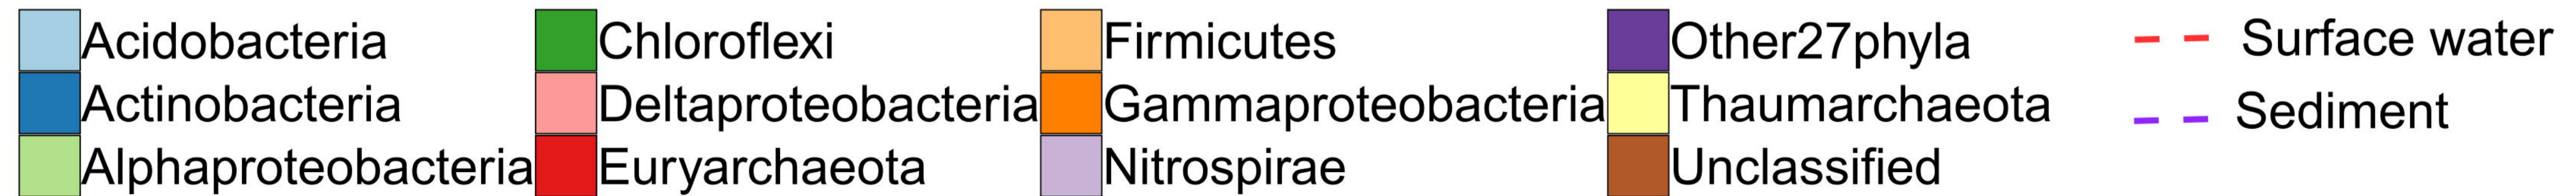

NMDS2

bioRxiv preprint doi: <https://doi.org/10.1101/663633>; this version posted June 10, 2019. The copyright holder for this preprint (which was not certified by peer review) is the author/funder, who has granted bioRxiv a license to display the preprint in perpetuity. It is made available under aCC-BY-NC-ND 4.0 International license.

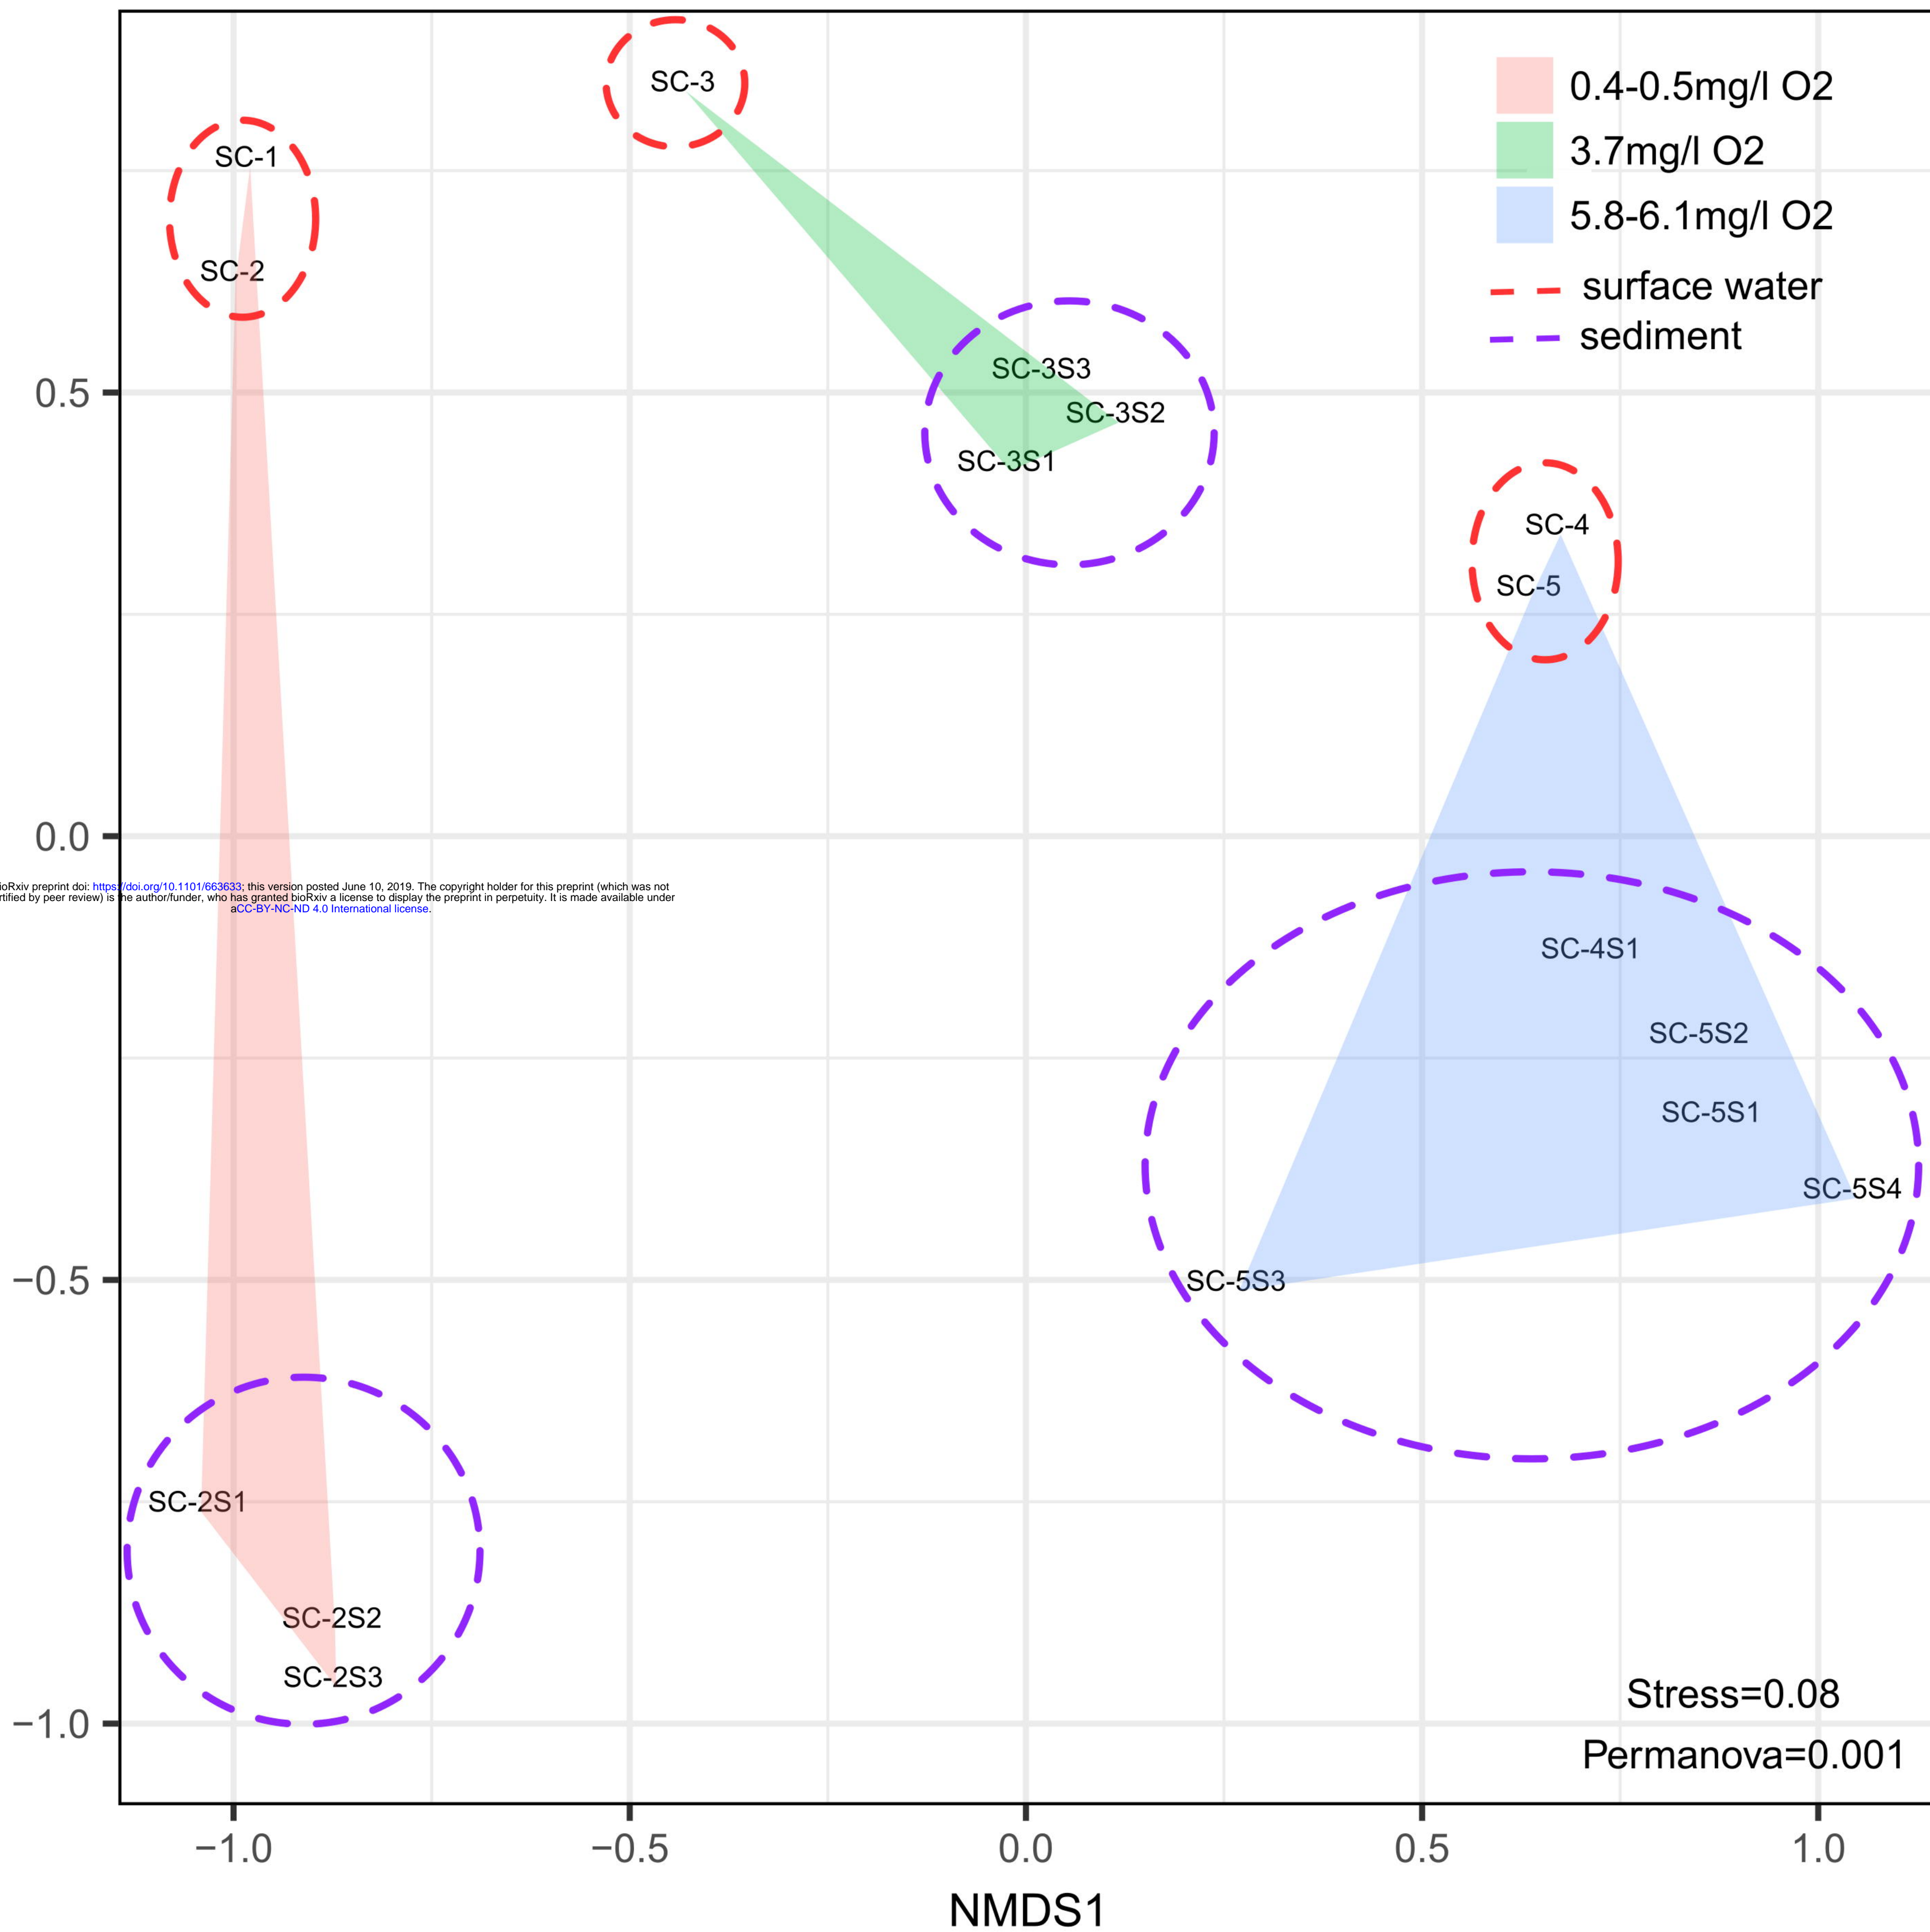

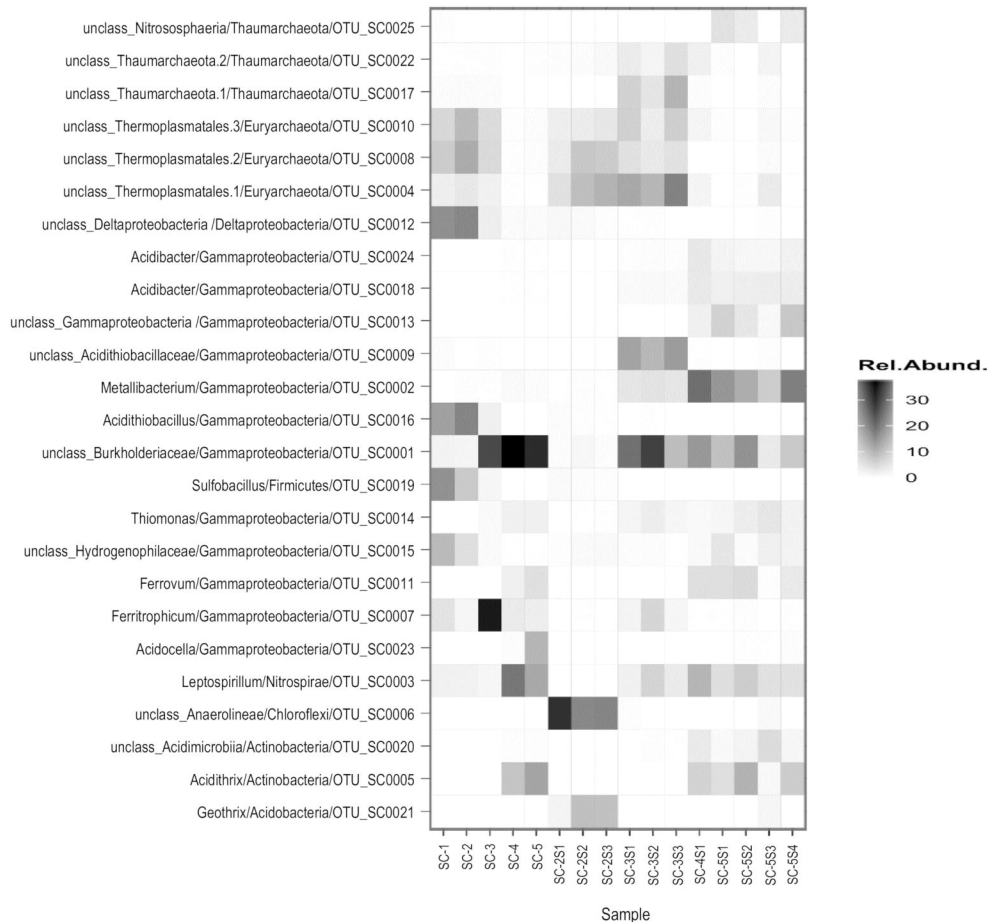

Source: https://www.biorxiv.org/content/10.1101/663633v1.full.pdf
